# Supplementary material for: Optimal Number of Systematic Biopsy Cores used for Magnetic Resonance Imaging/Transrectal Ultrasound Fusion Targeted Biopsy
Source: Research Square preprint supplement (doi:10.21203/rs.3.rs-133312/v1), 2021-01-19
Supplement: Supplementary file 2 [file 33c1a99fed9dadd31eddba3a.xlsx]

## Sheet: Sheet1
									Result of biopsy			Lesion①				Lesion②
No.	Age	PSA (ng/ml)	prostate volume (ml)	PSAD	Prior systematic biopsy	Abnormal digital rectal examination	Number of cores for systematic biopsy	Number of cores for targeted biopsy	Over all 0:negative 1:clinically significant PCa 2:clinically insignificant Pca	Systematic biopsy 0:negative 1:clinically significant PCa 2:clinically insignificant Pca	Targeted biopsy 0:negative 1:clinically significant PCa 2:clinically insignificant Pca	PI-RADS	Diameter (mm)	Result 0:negative 1:clinically significant PCa 2:clinically insignificant Pca	Gleason score	PI-RADS	Diameter (mm)	Result 0:negative 1:clinically significant PCa 2:clinically insignificant Pca	Gleason score
1	69	5.54	44.1	0.125624	Naïve	soft	14	2	2	2	0	3	14	0	0
2	65	10.38	46.1	0.225163	Naïve	soft	14	2	0	0	0	3	11	0	0
3	68	6.44	25.5	0.252549	Naïve	soft	14	2	1	1	1	4	7	1	4+3
4	76	15.27	63.1	0.241997	Naïve	soft	14	4	0	0	0	4	7	0	0	3	7	0	0
5	70	5.02	38.6	0.130052	Naïve	soft	14	2	2	2	0	5	11	0	0
6	46	10.78	33.2	0.324699	2 prior neg	soft	14	2	0	0	0	3	8	0	0
7	74	19.28	53	0.363774	Naïve	全体的に硬結有り	14	4	1	2	1	5	16	0	0	4	14	1	3+4
8	65	6.25	34	0.183824	Naïve	soft	14	2	0	0	0	3	7	0	0
9	74	6.13	45.5	0.134725	Naïve	soft	14	2	0	0	0	5	11	0	0
10	65	5.05	55.5	0.090991	Naïve	soft	14	2	1	0	1	3	13	1	4+5
11	70	5.22	26.6	0.196241	Naïve	induration +	14	4	1	1	1	4	13	1	3+4	3	8	2	3+3
12	71	8.89	95.1	0.0934805	Naïve	soft	14	4	0	0	0	4	7	0	0	3	5	0	0
13	63	6.65	37.8	0.175926	Naïve	soft	14	2	1	1	1	5	7	1	4+4
14	80	7.39	16	0.461875	Naïve	soft	14	2	1	0	1	3	8	1	3+4
15	59	8.9	38	0.234211	Naïve	soft	14	4	0	0	0	4	5	0	0	4	4	0	0
16	71	8.98	33.5	0.26806	1 Prior neg	soft	14	2	0	0	0	3	7	0	0
17	60	4.77	66.7	0.0715142	Naïve	soft	14	4	0	0	0	3	7	0	0	3	10	0	0
18	77	6.51	78.2	0.0832481	Naïve	soft	14	4	0	0	0	3	16	0	0	3	18	0	0
19	83	9.22	45.2	0.203982	Naïve	soft	14	4	1	1	1	4	12	1	4+3	4	7	2	3+3
20	68	4.87	33.5	0.145373	Naïve	soft	14	2	1	1	1	4	10	1	4+3
21	57	7.83	28.4	0.275704	Naïve	soft	14	2	0	0	0	3	8	0	0
22	75	12.35	17.1	0.722222	Naïve	induration +	14	2	1	1	1	5	16	1	3+4
23	56	10.18	34.4	0.29593	Naïve	soft	14	2	1	1	1	4	6	1	4+5
24	62	10.5	36.9	0.284553	1 Prior neg	soft	14	2	1	1	1	4	7	1	4+5
25	73	23.38	89.1	0.262402	3 Prior neg	soft	14	4	1	1	0	4	8	0	0	3	4	0	0
26	67	8.1	48.8	0.165984	Naïve	soft	14	4	0	0	0	4	8	0	0	3	21	0	0
27	75	7.77	28.6	0.271678	Naïve	soft	14	2	1	1	1	4	4	1	4+5
28	70	6.94	18.9	0.367196	Naïve	soft	14	2	1	1	1	4	5	1	4+3
29	71	11.19	51.1	0.218982	1 Prior neg	soft	14	2	0	0	0	4	10	0	0
30	74	5.83	55.9	0.104293	Naïve	soft	14	4	1	1	1	4	11	1	4+4	3	10	0	0
31	71	16.44	34.1	0.482111	Naïve	soft	14	4	0	0	0	3	11	0	0	3	4	0	0
32	73	10.2	26.3	0.387833	Naïve	soft	14	2	1	1	1	3	11	1	4+3
33	75	7.92	55.3	0.143219	Naïve	soft	14	2	1	1	1	4	8	1	4+3
34	70	5.37	73	0.0735616	Naïve	soft	14	4	1	1	0	5	15	0	0	4	12	0	0
35	70	15.76	67.2	0.234524	Naïve	soft	14	4	0	0	0	4	13	0	0	3	6	0	0
36	69	13.01	62.3	0.208828	Naïve	soft	14	2	0	0	0	3	5	0	0
37	81	12.58	75.6	0.166402	Naïve	induration +	14	4	1	1	1	5	25	1	4+4	4	9	1	4+3
38	76	7.69	44.8	0.171652	Naïve	induration +	14	2	1	1	1	4	10	1	3+4
39	78	15.61	40.8	0.382598	Naïve	soft	14	4	1	1	1	4	12	1	4+3	4	14	1	4+3
40	66	16.23	113	0.143628	1 Prior neg	soft	14	2	0	0	0	4	10	0	0
41	57	9.1	96.2	0.0945946	Naïve	soft	14	4	0	0	0	4	9	0	0	4	8	0	0
42	70	5.13	83.3	0.0615846	Naïve	soft	14	2	0	0	0	4	10	0	0
43	88	15.71	64.2	0.244704	Naïve	induration +	14	2	1	1	1	5	23	1	4+5
44	74	17.56	22	0.798182	Naïve	induration +	14	2	1	1	1	5	16	1	4+3
45	67	9.75	69.6	0.140086	1 Prior neg	soft	14	2	0	0	0	3	15	0	0
46	70	11.39	58.8	0.193707	Naïve	soft	14	2	2	2	2	3	13	2	3+3
47	75	7.03	21	0.334762	Naïve	induration +	14	2	1	1	1	4	10	1	4+5
48	64	8.21	28	0.293214	1 Prior neg	soft	14	4	1	1	1	4	10	1	3+3	4	8	2	3+3
49	44	8.29	23.3	0.355794	Naïve	soft	14	2	0	0	0	3	8	0	0
50	67	17.85	47.9	0.372651	2 prior neg	soft	14	4	0	0	0	4	10	0	0	3	10	0	0
51	63	6.76	24.2	0.279339	Naïve	soft	14	4	1	1	1	4	5	1	4+3	3	5	1	3+3
52	70	26.63	53.9	0.494063	Naïve	soft	14	4	1	1	1	5	14	1	4+4	3	10	2	3+3
53	69	7.45	19.5	0.382051	Naïve	induration +	14	2	1	1	1	5	16	1	4+4
54	71	10.74	32.5	0.330462	Naïve	induration +	14	4	1	1	1	5	13	1	4+3	4	4	2	3+3
55	74	6.05	37.5	0.161333	Naïve	soft	14	4	0	0	0	4	6	0	0	3	10	0	0
56	64	25.76	111	0.232072	Naïve	soft	14	4	0	0	0	4	12	0	0	4	9	0	0
57	70	7.65	72	0.10625	Naïve	soft	14	4	0	0	0	4	11	0	0	3	11	0	0
58	62	4.58	30.9	0.14822	Naïve	soft	14	4	1	1	2	4	4	0	0	3	4	2	3+3
59	53	5.61	37.9	0.148021	Naïve	induration +	14	2	1	1	2	4	13	2	3+3
60	72	8.43	89.4	0.0942953	1 Prior neg	soft	14	4	0	0	0	4	14	0	0	3	11	0	0
61	68	15.81	126.7	0.124783	1 Prior neg	soft	14	4	0	0	0	4	14	0	0	3	13	0	0
62	68	10.72	31	0.345806	1 Prior neg	induration +	14	2	1	1	1	4	10	1	4+3
63	85	10.35	43.9	0.235763	Naïve	soft	14	2	1	1	1	5	25	1	4+3
64	69	8.02	45.9	0.174728	Naïve	soft	14	4	1	1	1	4	11	1	3+4	3	7	0	0
65	85	18.97	22.8	0.832018	Naïve	induration +	14	4	1	1	1	5	17	1	4+4	4	12	1	4+4
66	76	8.63	36.2	0.238398	Naïve	soft	14	4	1	0	1	5	18	1	3+4	5	13	0	0
67	65	7.34	20.9	0.351196	Naïve	soft	14	4	1	1	1	4	11	1	3+4	3	10	1	4+4
68	69	5.62	20.9	0.2689	Naïve	soft	14	4	1	1	1	4	13	1	3+4	4	6	1	3+4
69	76	14.27	24.4	0.584836	Naïve	soft	14	2	1	1	1	4	8	1	4+4
70	67	13.4	69.1	0.193922	1 Prior neg	soft	14	4	0	0	0	4	9	0	0	4	4	0	0
71	67	9.36	30.1	0.310963	Naïve	soft	14	2	0	0	0	3	10	0	0
72	71	8.09	77.7	0.104118	1 Prior neg	soft	14	4	0	0	0	5	17	0	0	4	14	0	0
73	68	10.62	116.7	0.0910026	Naïve	soft	14	2	0	0	0	3	15	0	0
74	72	5.52	44.6	0.123767	Naïve	soft	14	2	0	0	0	3	5	0	0
75	76	10.08	112.4	0.0896797	1 Prior neg	soft	14	3	1	1	2	4	13	2	3+3
76	63	12.59	98	0.128469	Naïve	soft	14	4	0	0	0	5	2	0	0	3	10	0	0
77	71	6.85	73.2	0.0935792	Naïve	soft	14	4	0	0	0	3	4	0	0	3	3	0	0
78	78	14.84	43.1	0.344316	Naïve	soft	14	4	1	1	1	5	25	2	3+3	4	11	1	4+4
79	56	8.32	31.2	0.266667	1 Prior neg	soft	14	2	0	0	0	3	8	0	0
80	69	8.38	71.2	0.117697	1 Prior neg	soft	14	4	0	0	0	4	10	0	0	3	11	0	0
81	68	7.52	69.7	0.107891	Naïve	soft	14	2	0	0	0	3	9	0	0
82	75	12.63	58.6	0.215529	Naïve	soft	14	4	1	1	1	4	9	1	4+5	3	14	0	0
83	74	5.48	71.6	0.0765363	Naïve	soft	14	2	0	0	0	3	11	0	0
84	71	6.14	21.8	0.281651	Naïve	induration +	14	2	1	1	1	5	12	1	4+3
85	76	8.47	62.7	0.135088	Naïve	soft	14	4	1	1	0	4	6	0	0	3	5	0	0
86	69	20.63	42.5	0.485412	Naïve	induration +	14	2	1	1	1	5	13	1	4+4
87	65	5.87	47.7	0.123061	Naïve	soft	14	4	0	0	0	3	16	0	0	3	9	0	0
88	65	6.46	34.5	0.187246	Naïve	soft	14	4	1	1	1	3	8	0	0	3	4	1	4+5
89	72	10.96	57.1	0.191944	Naïve	soft	14	2	0	0	0	4	4	0	0
90	58	4.68	26.5	0.176604	Naïve	soft	14	2	0	0	0	3	6	0	0
91	70	8.19	43.3	0.189145	Naïve	soft	14	2	1	1	1	4	7	1	4+3
92	77	29.44	111	0.265225	Naïve	soft	14	2	0	0	0	3	11	0	0
93	77	8.61	23.3	0.369528	Naïve	induration +	14	2	1	1	1	5	27	1	3+4
94	68	16.83	51.1	0.329354	Naïve	soft	14	2	1	1	1	3	15	1	5+4
95	57	5.47	33.5	0.163284	Naïve	soft	14	2	1	2	1	4	11	1	3+4
96	70	5.74	50.1	0.114571	Naïve	soft	14	2	0	0	0	3	14	0	0
97	75	4.63	25	0.1852	Naïve	soft	14	4	1	1	2	4	6	2	3+3	4	4	0	0
98	87	12.95	18.6	0.696237	Naïve	soft	14	2	1	1	1	3	15	1	4+5
99	74	13.67	36.7	0.37248	Naïve	soft	14	4	1	1	1	4	9	1	4+4	4	4.5	1	4+3
100	66	4.51	51.7	0.087234	Naïve	soft	14	2	1	1	1	4	7	1	3+4
101	73	9.27	20.8	0.445673	Naïve	soft	14	2	0	0	0	3	5	0	0
102	54	16.56	63.3	0.261611	Naïve	soft	14	2	0	0	0	3	4	0	0
103	47	9.24	26.6	0.347368	Naïve	soft	14	2	1	1	1	4	10	1	3+4
104	68	8.7	34.4	0.252907	1 Prior neg	soft	14	2	0	0	0	3	7	0	0
